# Supplementary material for: Optimization of Aircraft Climb Trajectory considering Environmental Impact under RTA Constraints
Source: Hindawi journal article supplement (doi:10.1155/2020/2738517), 2020-08-28
Supplement: f1 [file 2738517.f1.zip]

Archive with 55 entries (49 files):
- Supplemental Files/
- Supplemental Files/Simulation data/
- Supplemental Files/Simulation data/Simulation data.xlsx
- Supplemental Files/Workspace data/
- Supplemental Files/Workspace data/flight distance/
- Supplemental Files/Workspace data/flight distance/best_v_1.mat
- Supplemental Files/Workspace data/flight distance/best_v_2.mat
- Supplemental Files/Workspace data/flight distance/best_v_3.mat
- Supplemental Files/Workspace data/flight distance/best_v_4.mat
- Supplemental Files/Workspace data/flight distance/best_v_5.mat
- Supplemental Files/Workspace data/flight distance/fitness_1.mat
- Supplemental Files/Workspace data/flight distance/fitness_2.mat
- Supplemental Files/Workspace data/flight distance/fitness_3.mat
- Supplemental Files/Workspace data/flight distance/fitness_4.mat
- Supplemental Files/Workspace data/flight distance/fitness_5.mat
- Supplemental Files/Workspace data/flight distance/p10time.png
- Supplemental Files/Workspace data/flight distance/time_1.png
- Supplemental Files/Workspace data/flight distance/time_2.png
- Supplemental Files/Workspace data/flight distance/time_3.png
- Supplemental Files/Workspace data/flight distance/time_4.png
- Supplemental Files/Workspace data/flight distance/time_5.png
- Supplemental Files/Workspace data/mass/
- Supplemental Files/Workspace data/mass/best_v_1.mat
- Supplemental Files/Workspace data/mass/best_v_2.mat
- Supplemental Files/Workspace data/mass/best_v_3.mat
- Supplemental Files/Workspace data/mass/best_v_4.mat
- Supplemental Files/Workspace data/mass/best_v_5.mat
- Supplemental Files/Workspace data/mass/fitness_1.mat
- Supplemental Files/Workspace data/mass/fitness_2.mat
- Supplemental Files/Workspace data/mass/fitness_3.mat
- Supplemental Files/Workspace data/mass/fitness_4.mat
- Supplemental Files/Workspace data/mass/fitness_5.mat
- Supplemental Files/Workspace data/mass/p10time.png
- Supplemental Files/Workspace data/mass/time_1.png
- Supplemental Files/Workspace data/mass/time_2.png
- Supplemental Files/Workspace data/mass/time_3.png
- Supplemental Files/Workspace data/mass/time_4.png
- Supplemental Files/Workspace data/mass/time_5.png
- Supplemental Files/Workspace data/wind/
- Supplemental Files/Workspace data/wind/best_v_1.mat
- Supplemental Files/Workspace data/wind/best_v_2.mat
- Supplemental Files/Workspace data/wind/best_v_3.mat
- Supplemental Files/Workspace data/wind/best_v_4.mat
- Supplemental Files/Workspace data/wind/best_v_5.mat
- Supplemental Files/Workspace data/wind/fitness_1.mat
- Supplemental Files/Workspace data/wind/fitness_2.mat
- Supplemental Files/Workspace data/wind/fitness_3.mat
- Supplemental Files/Workspace data/wind/fitness_4.mat
- Supplemental Files/Workspace data/wind/fitness_5.mat
- Supplemental Files/Workspace data/wind/p10time.png
- Supplemental Files/Workspace data/wind/time_1.png
- Supplemental Files/Workspace data/wind/time_2.png
- Supplemental Files/Workspace data/wind/time_3.png
- Supplemental Files/Workspace data/wind/time_4.png
- Supplemental Files/Workspace data/wind/time_5.png
