# Supplementary material for: Optimization of Aircraft Climb Trajectory considering Environmental Impact under RTA Constraints
Source: Hindawi journal article supplement (doi:10.1155/2020/2738517), 2020-08-28
Supplement: f1 [file 2738517.f1.zip › Supplemental Files/Simulation data/Simulation data.xlsx]

## Sheet: wind
population size	wind_speed	best_v	fitness	fuel	TE	CO2	NOx	warm index	Running time(s)
10	-30	296.25	0.989259	1878.38	2.99233e-12	5851.15	36.5514	1.59304e-15	1179.55
		289.137	0.989664	1868.2	3.00667e-12	5819.45	35.7543	1.60939e-15
		290.664	0.98969	1870.12	3.00334e-12	5825.43	35.9171	1.60596e-15
		289.375	0.989672	1868.49	3.00614e-12	5820.35	35.7794	1.60886e-15
		290.664	0.98969	1870.12	3.00334e-12	5825.43	35.9171	1.60596e-15
50	-30	290.664	0.98969	1870.12	3.00334e-12	5825.43	35.9171	1.60596e-15	5111.85
		291.094	0.989686	1870.69	3.00242e-12	5827.2	35.9637	1.60498e-15	5281.47
		289.375	0.989672	1868.49	3.00614e-12	5820.35	35.7794	1.60886e-15	5242.32
		290.664	0.98969	1870.12	3.00334e-12	5825.43	35.9171	1.60596e-15	5315.95
		290.234	0.989689	1869.57	3.00426e-12	5823.7	35.8708	1.60693e-15	5308.02

## Sheet: mass
population size	M_A	v	fitness	fuel	TE	CO2	NOx	warm index	Running time(s)
10	65000	268.75	1.0051	1834.94	2.96805e-12	5715.84	34.8254	1.61752e-15	1169
		268.75	1.0051	1834.94	2.96805e-12	5715.84	34.8254	1.61752e-15
		266.172	1.005	1831.91	2.97369e-12	5706.41	34.5612	1.62327e-15
		268.75	1.0051	1834.94	2.96805e-12	5715.84	34.8254	1.61752e-15
		265.795	1.00496	1831.51	2.97456e-12	5705.14	34.5237	1.6241e-15
50	65000	268.884	1.0051	1835.11	2.96777e-12	5716.37	34.8395	1.61722e-15	4579.72
		268.724	1.0051	1834.91	2.96811e-12	5715.74	34.8227	1.61758e-15	4527.42
		268.884	1.0051	1835.11	2.96777e-12	5716.37	34.8395	1.61722e-15	4724.78
		268.724	1.0051	1834.91	2.96811e-12	5715.74	34.8227	1.61758e-15	4758.91
		268.711	1.0051	1834.89	2.96814e-12	5715.69	34.8213	1.61761e-15	4998.96

## Sheet: flight distance
population size	distance	v	fitness	fuel	TE	CO2	NOx	warm index	Running time(s)
10	200000	273.477	1.20005	1561.98	2.44431e-12	4865.56	31.2571	1.56488e-15	1188.23
		273.906	1.20005	1562.46	2.44352e-12	4867.07	31.297	1.56389e-15
		271.808	1.20001	1560.19	2.44746e-12	4860	31.1047	1.56869e-15
		275.625	1.19999	1564.48	2.44044e-12	4873.36	31.4598	1.5599e-15
		272.188	1.20002	1560.59	2.44673e-12	4861.22	31.139	1.56783e-15
50	200000	273.349	1.20005	1561.84	2.44454e-12	4865.12	31.2453	1.56517e-15	4950.57
		273.509	1.20005	1562.01	2.44425e-12	4865.67	31.2601	1.5648e-15	5339.65
		273.668	1.20005	1562.19	2.44395e-12	4866.23	31.2749	1.56444e-15	5558.23
		273.509	1.20005	1562.01	2.44425e-12	4865.67	31.2601	1.5648e-15	5446.32
		273.536	1.20005	1562.04	2.4442e-12	4865.77	31.2626	1.56474e-15	5629.76
