# Supplementary figures and images for: Optimization of Aircraft Climb Trajectory considering Environmental Impact under RTA Constraints
Source: Hindawi journal article supplement (doi:10.1155/2020/2738517), 2020-08-28

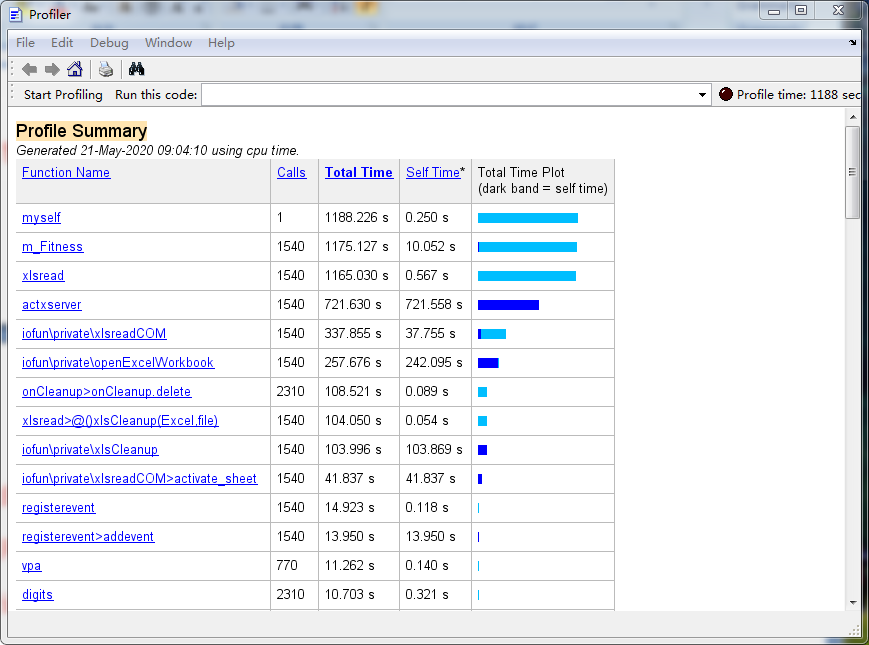

Supplement: f1 [file 2738517.f1.zip › Supplemental Files/Workspace data/flight distance/p10time.png]

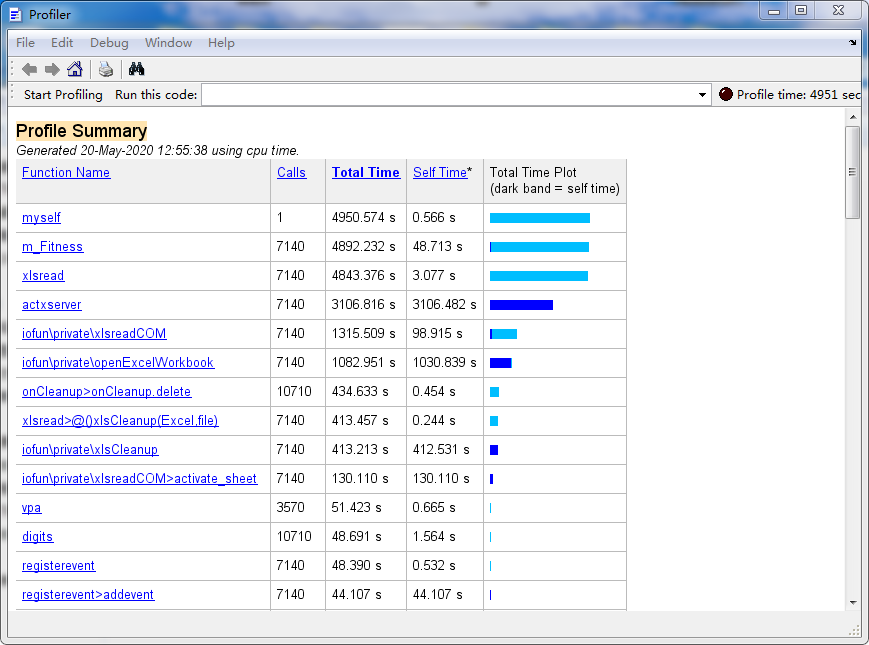

Supplement: f1 [file 2738517.f1.zip › Supplemental Files/Workspace data/flight distance/time_1.png]

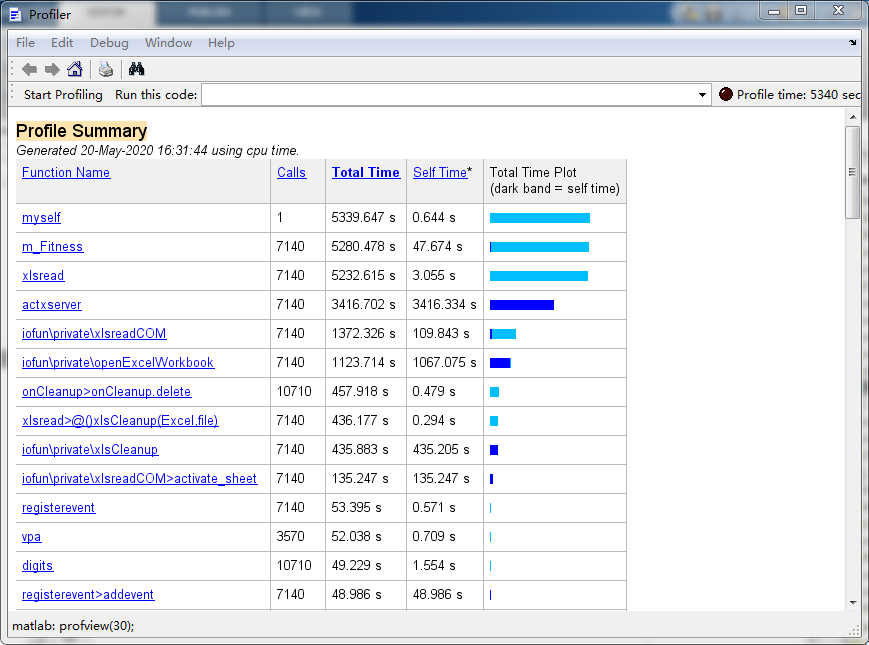

Supplement: f1 [file 2738517.f1.zip › Supplemental Files/Workspace data/flight distance/time_2.png]

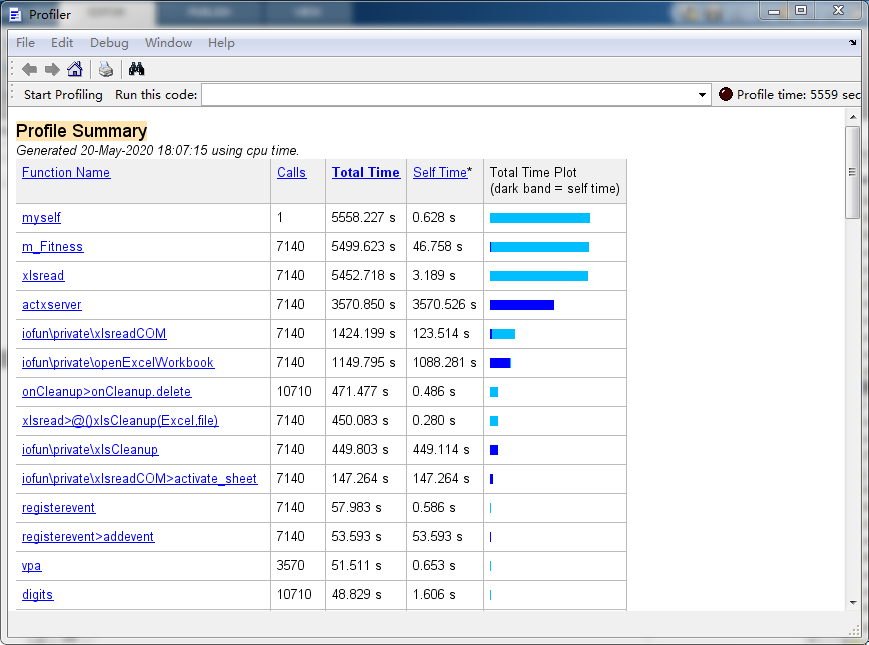

Supplement: f1 [file 2738517.f1.zip › Supplemental Files/Workspace data/flight distance/time_3.png]

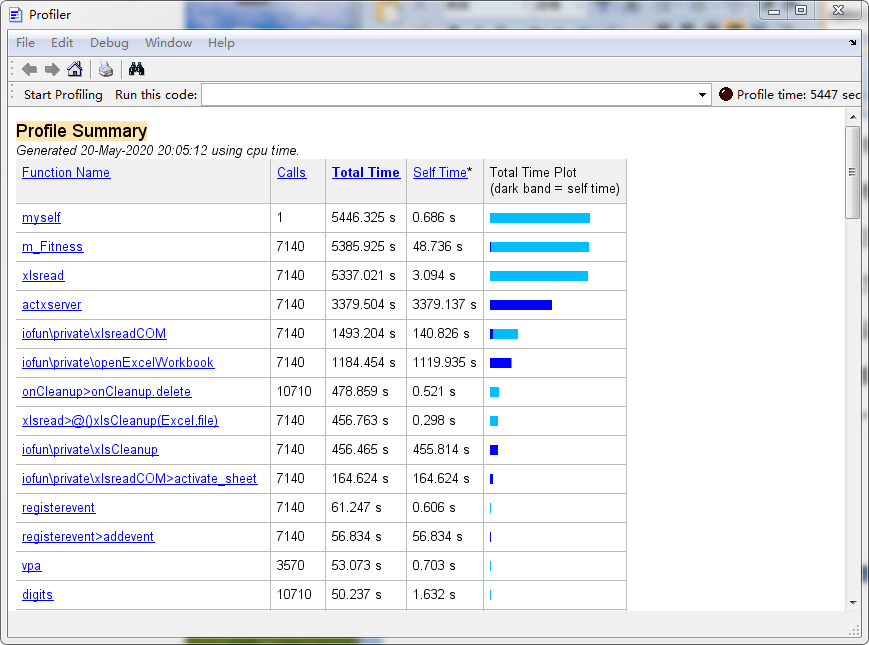

Supplement: f1 [file 2738517.f1.zip › Supplemental Files/Workspace data/flight distance/time_4.png]

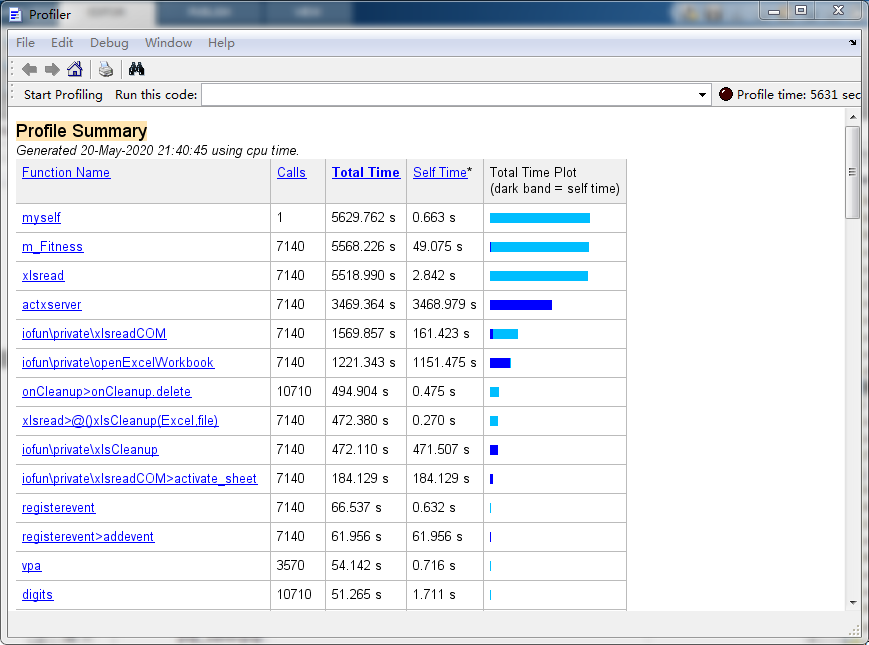

Supplement: f1 [file 2738517.f1.zip › Supplemental Files/Workspace data/flight distance/time_5.png]

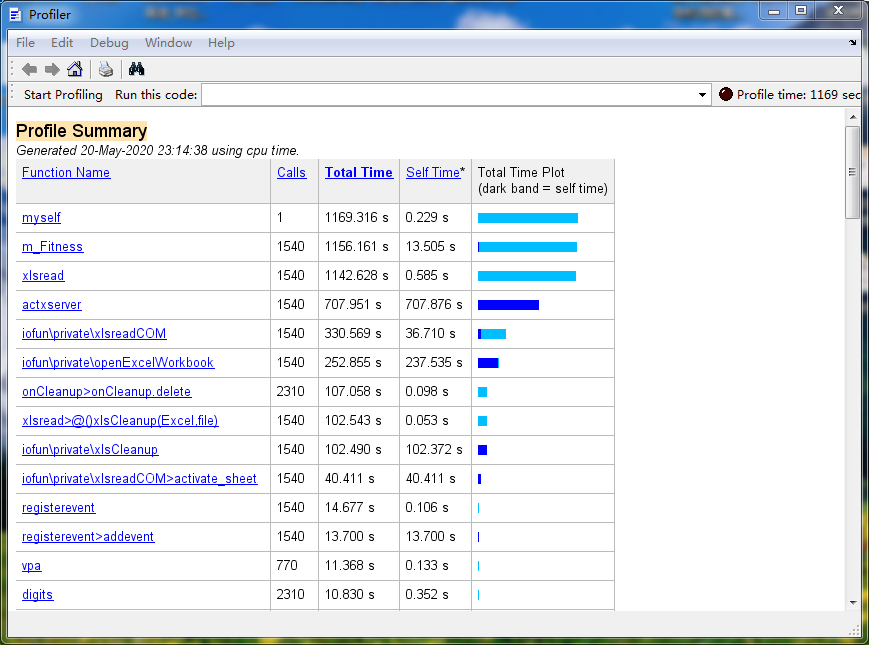

Supplement: f1 [file 2738517.f1.zip › Supplemental Files/Workspace data/mass/p10time.png]

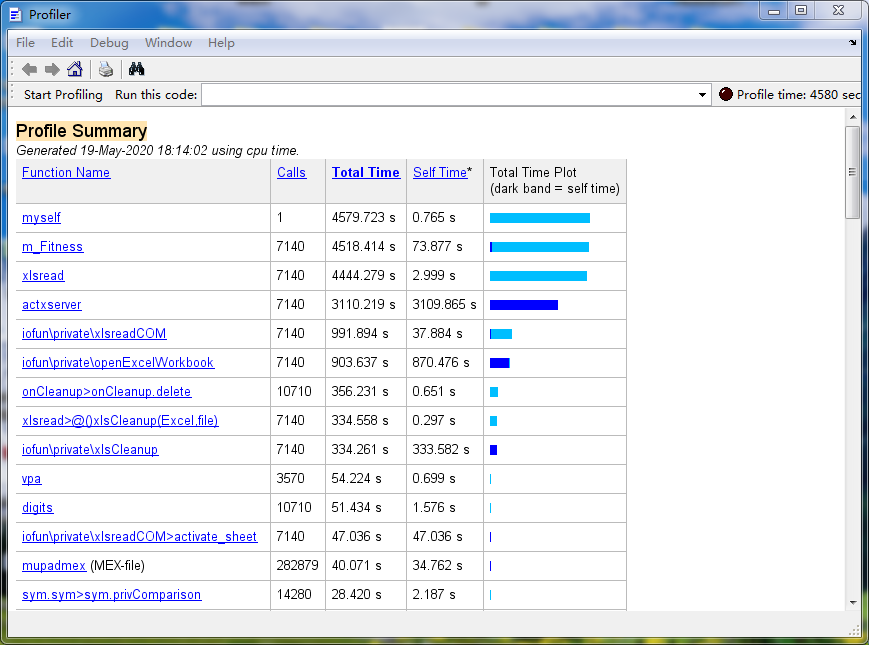

Supplement: f1 [file 2738517.f1.zip › Supplemental Files/Workspace data/mass/time_1.png]

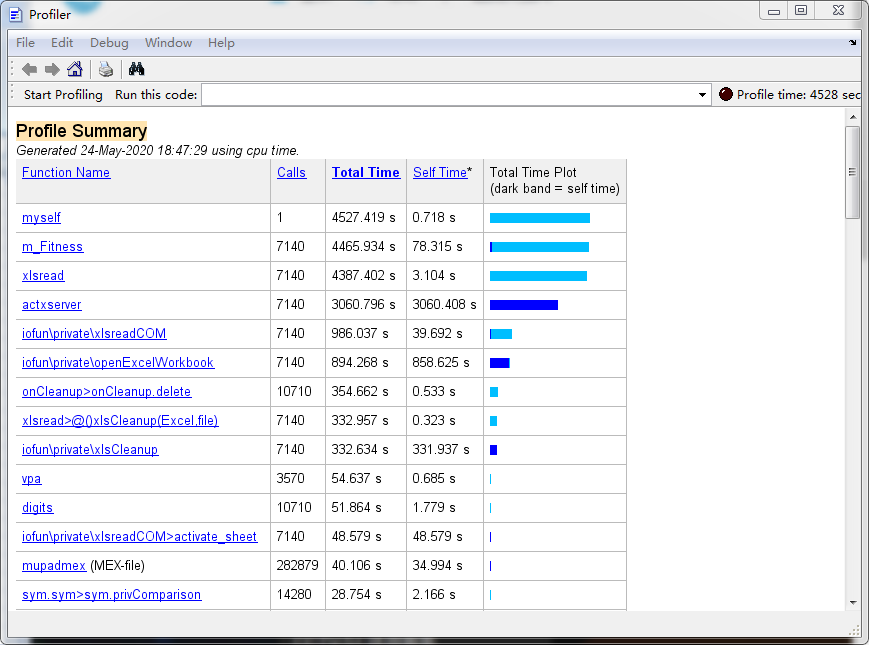

Supplement: f1 [file 2738517.f1.zip › Supplemental Files/Workspace data/mass/time_2.png]

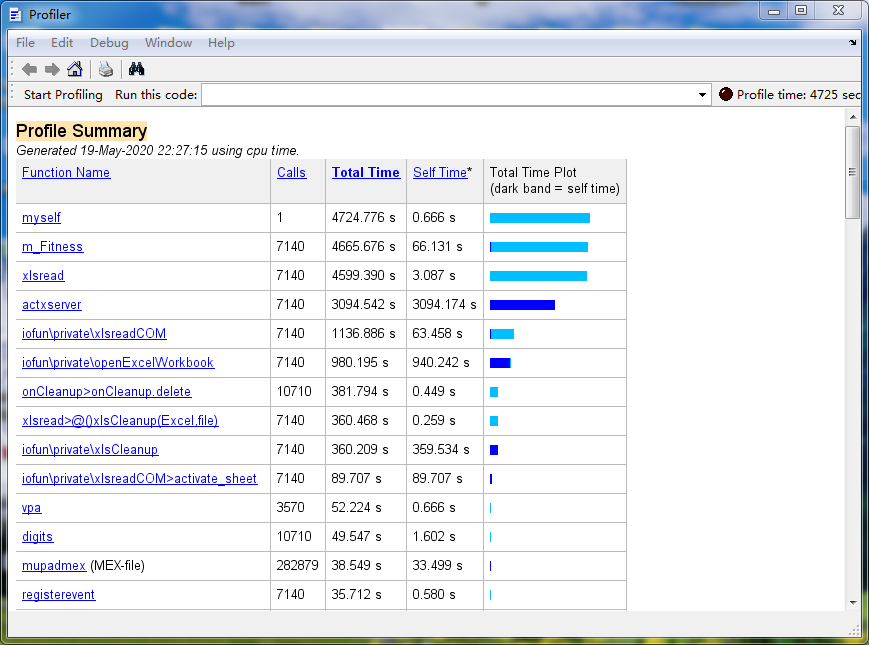

Supplement: f1 [file 2738517.f1.zip › Supplemental Files/Workspace data/mass/time_3.png]

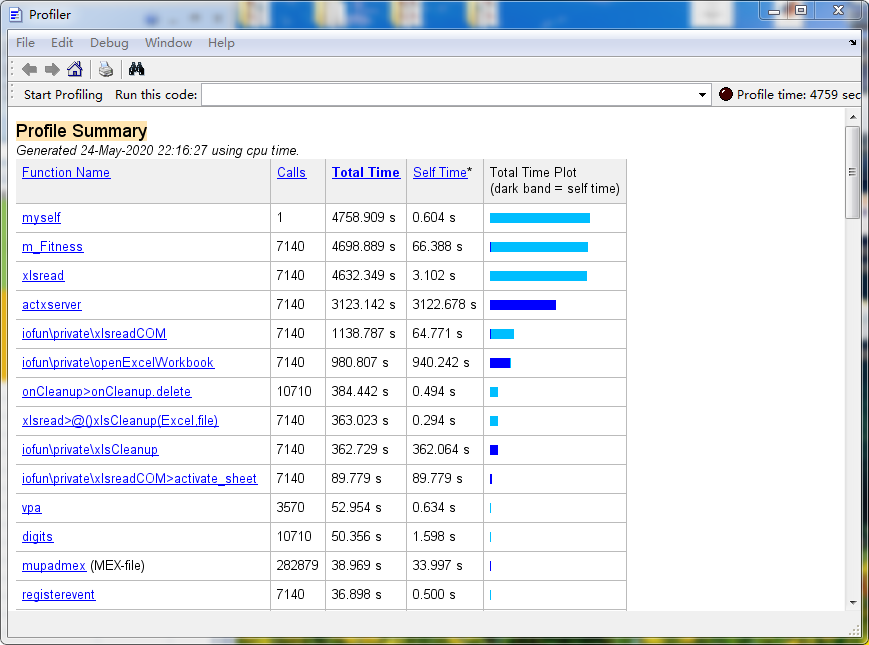

Supplement: f1 [file 2738517.f1.zip › Supplemental Files/Workspace data/mass/time_4.png]

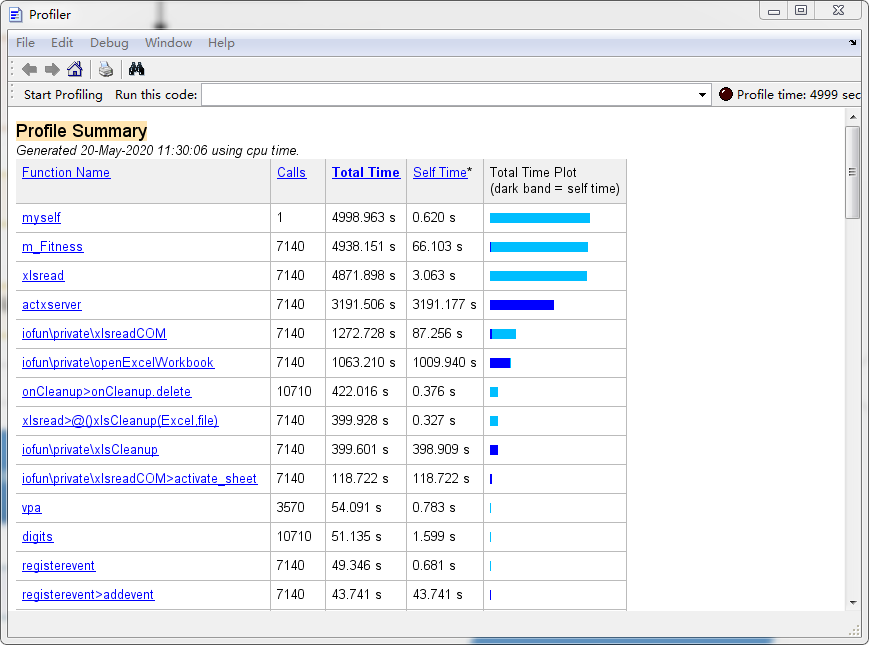

Supplement: f1 [file 2738517.f1.zip › Supplemental Files/Workspace data/mass/time_5.png]

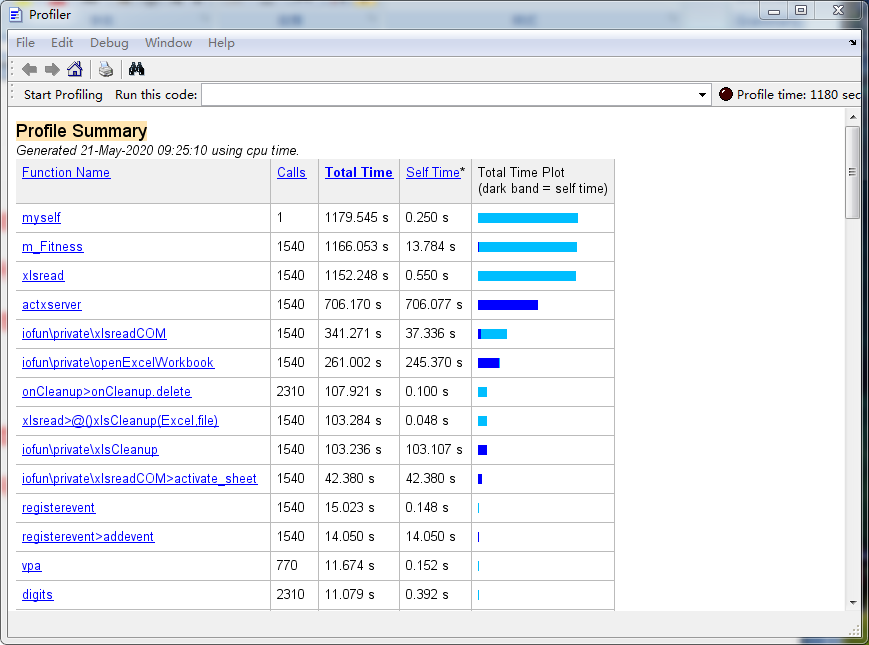

Supplement: f1 [file 2738517.f1.zip › Supplemental Files/Workspace data/wind/p10time.png]

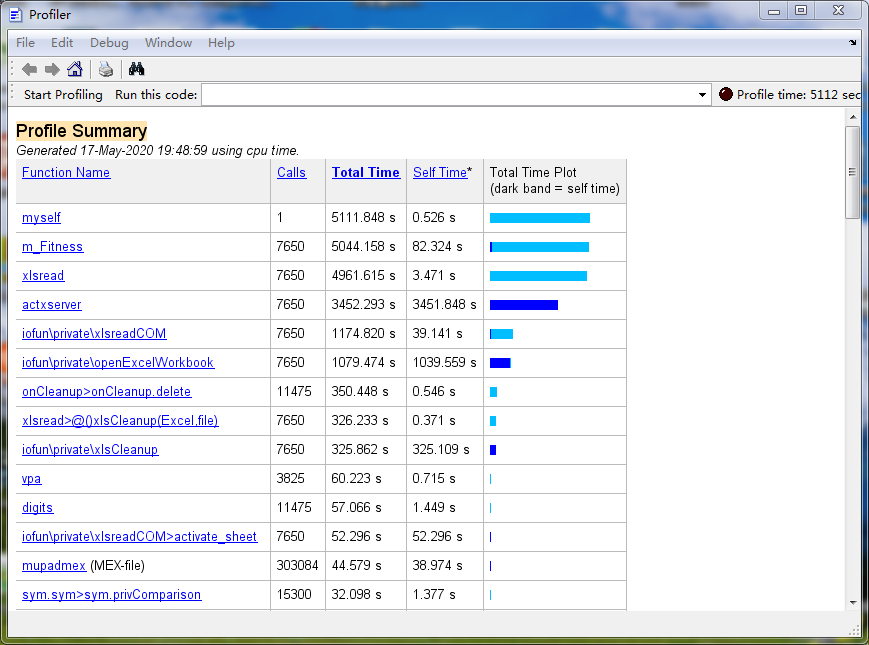

Supplement: f1 [file 2738517.f1.zip › Supplemental Files/Workspace data/wind/time_1.png]

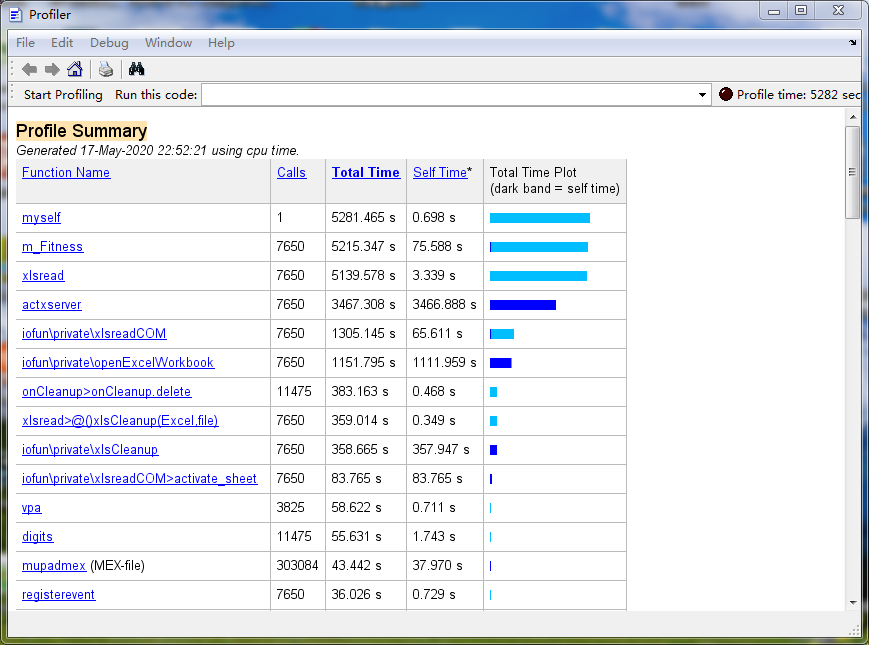

Supplement: f1 [file 2738517.f1.zip › Supplemental Files/Workspace data/wind/time_2.png]

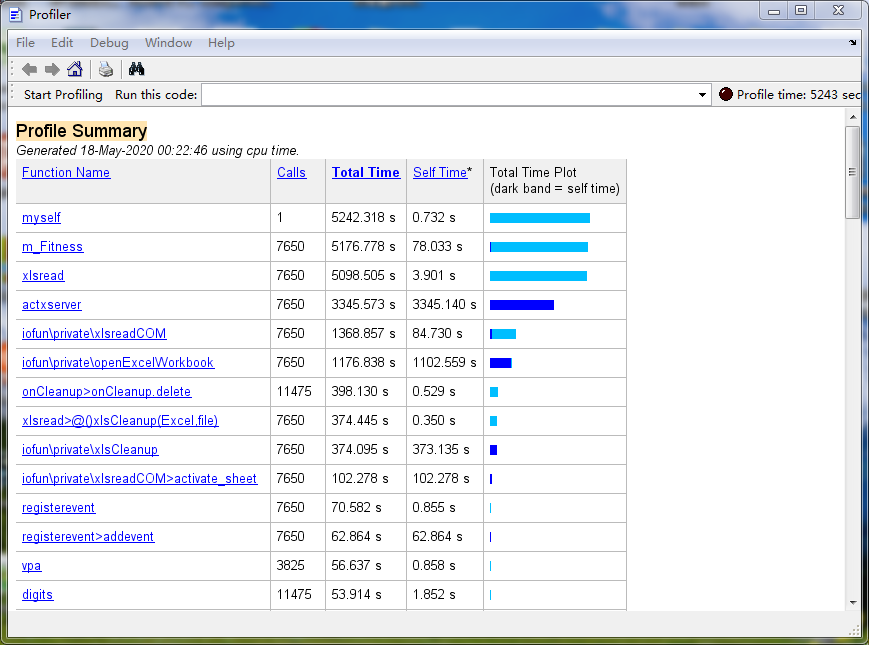

Supplement: f1 [file 2738517.f1.zip › Supplemental Files/Workspace data/wind/time_3.png]

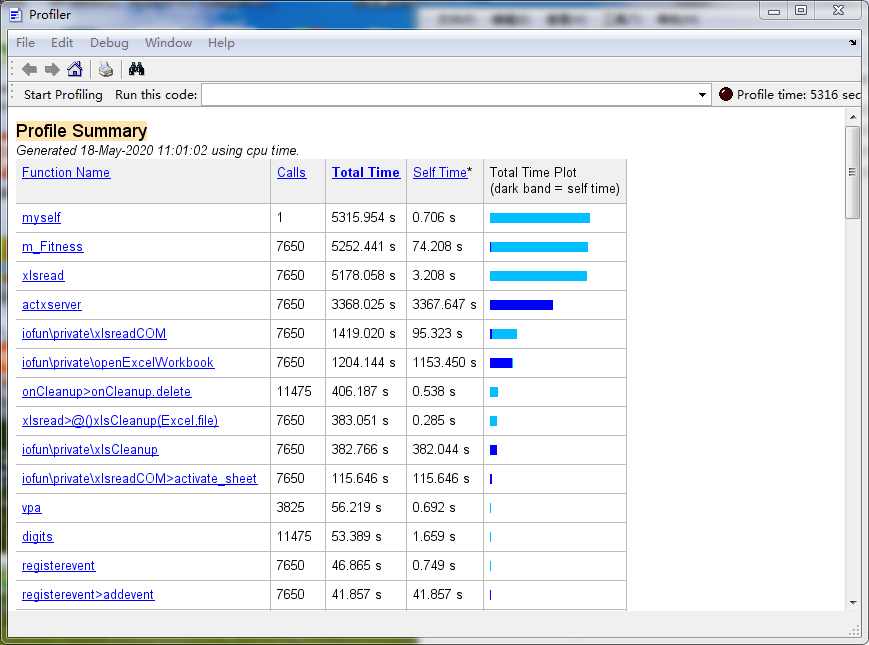

Supplement: f1 [file 2738517.f1.zip › Supplemental Files/Workspace data/wind/time_4.png]

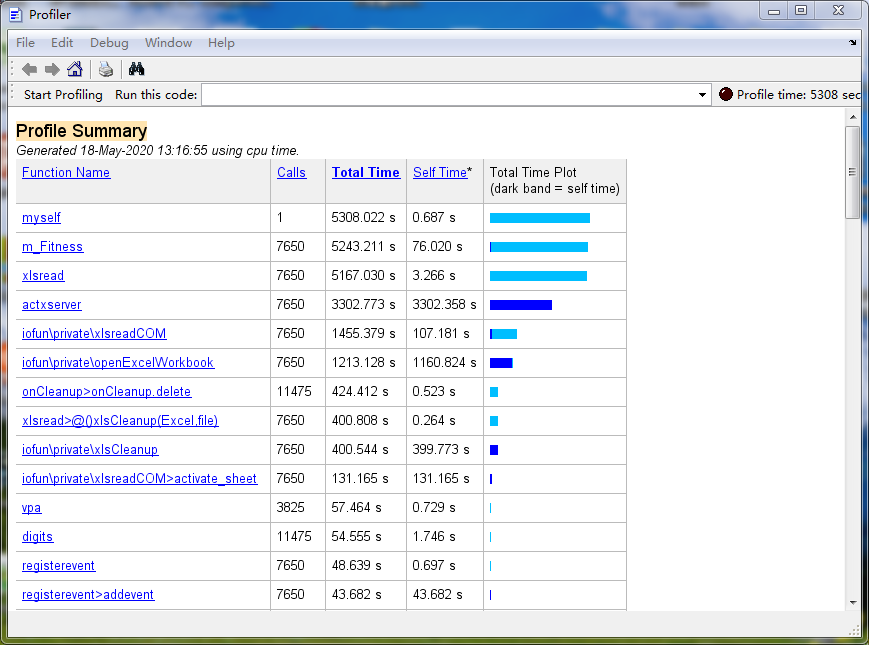

Supplement: f1 [file 2738517.f1.zip › Supplemental Files/Workspace data/wind/time_5.png]
